# Supplementary material for: Constructing a nitrogen-doped carbon and nickel composite derived from a mixed ligand nickel-based a metal–organic framework toward adjustable microwave absorption
Source: Royal Society of Chemistry journal article supplement (doi:10.1039/d1nr01607e), 2021-01-01
Supplement: d1nr01607e1.pdf [file d1nr01607e1.pdf]

Supporting information

**Constructing nitrogen-doped carbon and nickel  
composite derived from mixed ligands nickel based metal  
organic framework toward adjustable microwave  
absorption**

Yun Qiu <sup>a</sup>, Haibo Yang <sup>a\*</sup>, Yan Cheng <sup>a</sup>, Xiaoyu Bai<sup>b</sup>, Bo Wen<sup>a</sup>, Ying Lin <sup>a\*</sup>

<sup>a</sup> Shaanxi Key Laboratory of Green Preparation and Functionalization for Inorganic Materials,  
School of Materials Science and Engineering, Shaanxi University of Science and Technology,

Xi'an 710021, China

<sup>b</sup> Xi'an HeRong New Energy Technology Co. LTD, Xi'an 710018, China

\*Corresponding authors. yanghaibo@sust.edu.cn (Haibo Yang)

\*Corresponding authors. linying\_333@163.com

---

\* Corresponding author. Tel: +86-29-86168688, Fax: +86-29-86168688. Email: yanghaibo@sust.edu.cn

\* Corresponding author. Tel: +86-29-86168688, Fax: +86-29-86168688. Email: linying\_333@163.com

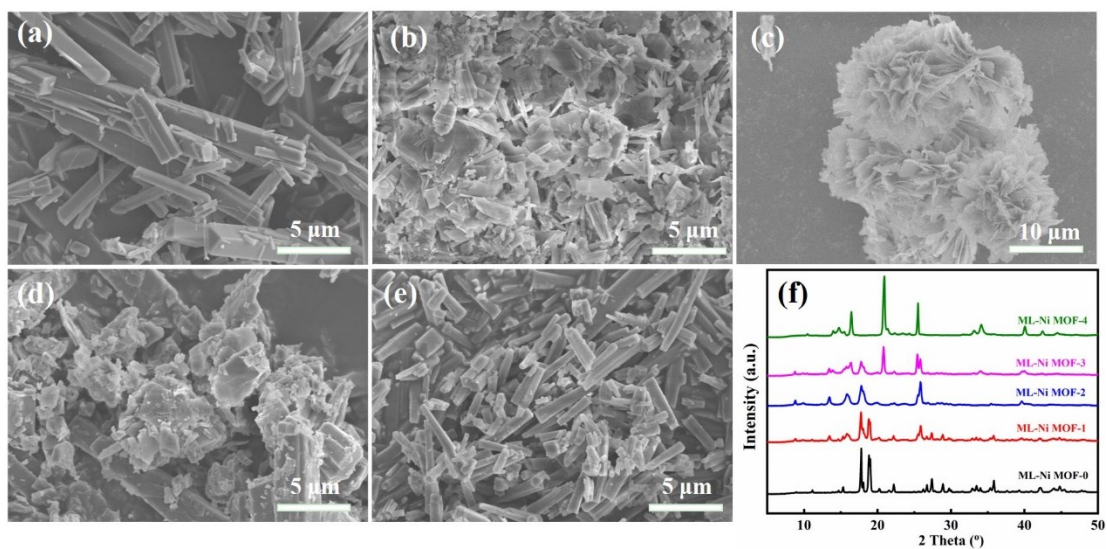

Figure S1 SEM images of (a) ML-Ni MOF-0, (b) ML-Ni MOF-1, (c) ML-Ni MOF-2, (d) ML-Ni MOF-3, (e) ML-Ni MOF-4, and (f) XRD pattern of ML-Ni MOF precursors.

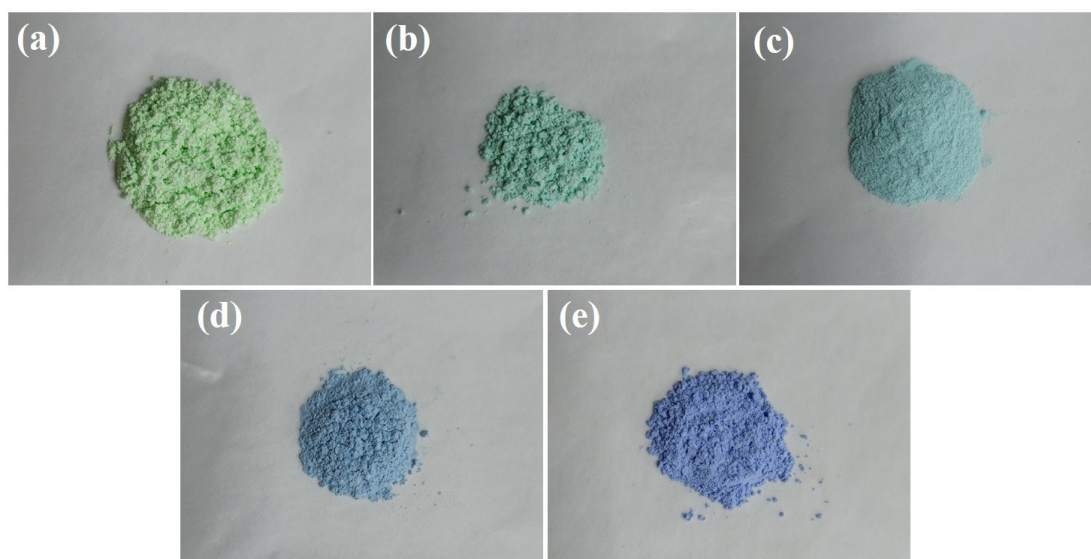

Figure S2 The color of (a) ML-Ni MOF-0, (b) ML-Ni MOF-1, (c) ML-Ni MOF-2, (d) ML-Ni MOF-3, (e) ML-Ni MOF-4 precursors.

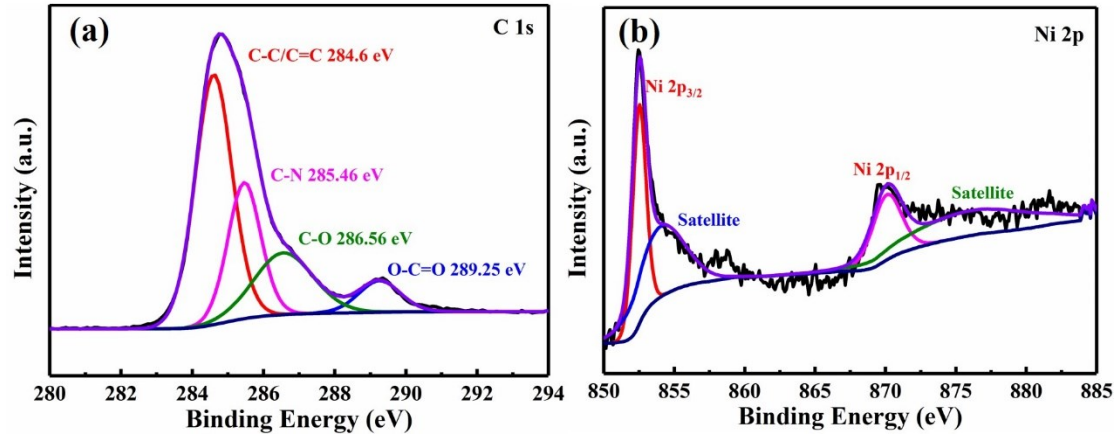

Figure S3 The high resolution XPS spectra of (a) C 1s, and (b) Ni 2p for ML-Ni/C-2 composite

Table S1 The specific surface areas, pore volumes and pore size of all ML-Ni/C composites.

| Samples   | $S_{\text{BET}}$ ( $\text{m}^2 \text{g}^{-1}$ ) | $V_{\text{pore}}$ ( $\text{cm}^3 \text{g}^{-1}$ ) | $D_{\text{pore}}$ (nm) |
|-----------|-------------------------------------------------|---------------------------------------------------|------------------------|
| ML-Ni/C-0 | 123.45                                          | 0.043                                             | 3.7                    |
| ML-Ni/C-1 | 140.37                                          | 0.293                                             | 3.7 and 13.2           |
| ML-Ni/C-2 | 186.27                                          | 0.652                                             | 20.5                   |
| ML-Ni/C-3 | 268.25                                          | 0.501                                             | 3.8 and 9.6            |
| ML-Ni/C-4 | 149.03                                          | 0.445                                             | 3.7 and 19.4           |

Table S2 The contents of C, N, O, and Ni elements for ML-Ni/C composites

| Samples   | C           | N          | O           | Ni         |
|-----------|-------------|------------|-------------|------------|
| ML-Ni/C-0 | 88.99 at. % | ---        | 9.97 at. %  | 1.04 at. % |
| ML-Ni/C-1 | 83.70 at. % | 0.78 at. % | 15.29 at. % | 0.23 at. % |
| ML-Ni/C-2 | 87.49 at. % | 2.19 at. % | 9.37 at. %  | 0.95 at. % |
| ML-Ni/C-3 | 84.21 at. % | 4.91 at. % | 10.43 at. % | 0.45 at. % |
| ML-Ni/C-4 | 85.23 at. % | 4.13 at. % | 10.03 at. % | 0.62 at. % |
